# Supplementary material
Source: PubMed Central journal article supplement (PMC4115538)
Supplement: 1406305111_pnas.201406305SI.pdf [file 1406305111_pnas.201406305SI.pdf]

# Supporting Information

Vlahakis et al. 10.1073/pnas.1406305111

Table S1. *Saccharomyces cerevisiae* strains used in this study

| Strain               | Genotype                                                                                  | Source     |
|----------------------|-------------------------------------------------------------------------------------------|------------|
| W303 $\alpha$        | <i>MAT<math>\alpha</math> leu2-3, -112; his3-11,-15; trp1-1; ura3-1; ade2-1; can1-100</i> | (1)        |
| PLY1141              | W303 $\alpha$ , except <i>avo3-30-MYC:TRP1</i>                                            | This study |
| <i>atg7</i> $\Delta$ | W303 $\alpha$ , except <i>atg7::kanMX6</i>                                                | (2)        |
| PLY521               | W303 $\alpha$ , except <i>ypk1::TRP1</i>                                                  | (3)        |
| PLY1360              | W303 $\alpha$ , except <i>ypk2::HIS3MX6</i>                                               | (3)        |
| PLY1569              | W303 $\alpha$ , except <i>cnb1::kanMX6</i>                                                | This study |
| PLY1570              | W303 $\alpha$ , except <i>ypk1::TRP1 cnb1::kanMX6</i>                                     | This study |
| PLY1571              | W303 $\alpha$ , except <i>atg19::HIS3MX6 2xyEGFP-ATG8:URA3</i>                            | This study |
| PLY1572              | W303 $\alpha$ , except <i>ypk1::TRP1 atg19::HIS3MX6 2xyEGFP-ATG8:URA3</i>                 | This study |
| PLY1573              | W303 $\alpha$ , except <i>cnb1::kanMX6 atg19::HIS3MX6 2xyEGFP-ATG8:URA3</i>               | This study |
| PLY1574              | W303 $\alpha$ , except <i>ypk1::TRP1 cnb1::kanMX6 atg19::HIS3MX6 2xyEGFP-ATG8:URA3</i>    | This study |
| PLY1575              | W303 $\alpha$ , except <i>gcn2::kanMX6</i>                                                | This study |
| PLY1576              | W303 $\alpha$ , except <i>ypk1::TRP1 gcn2::kanMX6</i>                                     | This study |
| PLY1596              | W303 $\alpha$ , except <i>crz1::kanMX6</i>                                                | This study |
| PLY1597              | W303 $\alpha$ , except <i>ypk1::TRP1 crz1::kanMX6</i>                                     | This study |
| JGY149               | W303a, except <i>cmd1-6</i>                                                               | (4)        |
| PLY1599              | W303a, except <i>cmd1-6 ypk1::TRP1</i>                                                    | This study |

1. Nasmyth KA (1990) FAR-reaching discoveries about the regulation of START. *Cell* 63(6):1117–1120.
2. Graef M, Nunnari J (2011) Mitochondria regulate autophagy by conserved signalling pathways. *EMBO J* 30(11):2101–2114.
3. Niles BJ, Joslin AC, Fresques T, Powers T (2014) TOR complex 2-Ypk1 signaling maintains sphingolipid homeostasis by sensing and regulating ROS accumulation. *Cell Reports* 6(3):541–552.
4. Moser MJ, Geiser JR, Davis TN (1996) Ca<sup>2+</sup>-calmodulin promotes survival of pheromone-induced growth arrest by activation of calcineurin and Ca<sup>2+</sup>-calmodulin-dependent protein kinase. *Mol Cell Biol* 16(9):4824–4831.

**Table S2. Plasmids used in this study**

| Plasmid                         | Vector  | Insert/ORF                              | Source     |
|---------------------------------|---------|-----------------------------------------|------------|
| pr <sup>ATG8</sup> -GFP-ATG8    | pRS416  | pr <sup>ATG8</sup> -GFP-ATG8            | (1)        |
| pPL590                          | pRS415  | pr <sup>ATG8</sup> -GFP-ATG8            | This study |
| pRS426- pr <sup>ATG8</sup> -GFP | pRS426  | pr <sup>ATG8</sup> -GFP                 | (2)        |
| pPL250                          | pRS315  | Pr <sup>YPK1</sup> -YPK1                | (3)        |
| pPL491                          | pPL420  | pMET25-YPK1 <sup>S644A T662A</sup> -3HA | (4)        |
| pAMS363                         | pAMS363 | 2xCDRE: <i>lacZ</i>                     | (5)        |
| pRS306-2xyEGFP-ATG8             | pRS306  | pr <sup>ATG8</sup> -2xyEGFP-ATG8        | (6)        |
| p180                            | p180    | GCN4 URE -1 to -4: <i>lacZ</i>          | (7)        |
| pB107                           | pRS316  | GCN2                                    | (8)        |
| pB111                           | pB107   | GCN2 <sup>c</sup> S577A                 | (8)        |

- Abeliovich H, Zhang C, Dunn WA, Jr, Shokat KM, Klionsky DJ (2003) Chemical genetic analysis of Apg1 reveals a non-kinase role in the induction of autophagy. *Mol Biol Cell* 14(2):477–490.
- Graef M, Nunnari J (2011) Mitochondria regulate autophagy by conserved signalling pathways. *EMBO J* 30(11):2101–2114.
- Niles BJ, Mogri H, Hill A, Vlahakis A, Powers T (2012) Plasma membrane recruitment and activation of the AGC kinase Ypk1 is mediated by target of rapamycin complex 2 (TORC2) and its effector proteins Slm1 and Slm2. *Proc Natl Acad Sci USA* 109(5):1536–1541.
- Niles BJ, Joslin AC, Fresques T, Powers T (2014) TOR complex 2-Ypk1 signaling maintains sphingolipid homeostasis by sensing and regulating ROS accumulation. *Cell Reports* 6(3):541–552.
- Stathopoulos AM, Cyert MS (1997) Calcineurin acts through the CRZ1/TCN1-encoded transcription factor to regulate gene expression in yeast. *Genes Dev* 11(24):3432–3444.
- Graef M, Friedman JR, Graham C, Babu M, Nunnari J (2013) ER exit sites are physical and functional core autophagosome biogenesis components. *Mol Biol Cell* 24(18):2918–2931.
- Hinnebusch AG (1985) A hierarchy of trans-acting factors modulates translation of an activator of amino acid biosynthetic genes in *Saccharomyces cerevisiae*. *Mol Cell Biol* 5(9):2349–2360.
- Garcia-Barrio M, et al. (2002) Serine 577 is phosphorylated and negatively affects the tRNA binding and eIF2alpha kinase activities of GCN2. *J Biol Chem* 277(34):30675–30683.
